# Supplementary material for: Kinetics of Indigenous Nitrate Reducing Sulfide Oxidizing Activity in Microaerophilic Wastewater Biofilms
Source: PLoS One. 2016 Feb 12;11(2):e0149096. doi: 10.1371/journal.pone.0149096 (PMC4752510; doi:10.1371/journal.pone.0149096)
Supplement: S9 Dataset — (XLSX) [file pone.0149096.s009.xlsx]

## Sheet: Figure 9
Figure 9 a	Figure 9 a	Figure 9 a		Figure 9 b	Figure 9 b	Figure 9 b	Figure 9 b	Figure 9 b		Figure 9 c	Figure 9 c	Figure 9 c	Figure 9 c	Figure 9 c	Figure 9 c	Figure 9 c
X1	Y1	Y1		X1	Y1	Y1	Y2	Y2		X1	Y1	Y1	Y2	Y2	Y1	Y2
SO42-	mean NO2-	SD NO2-		NO3-	mean NO2- @2mMSO4	SD NO2- @2mM SO4	mean NO2- @10mMSO4	SD NO2- @10mM SO4		NO3-	mean NO3- @2mMSO4	SD NO3- @2mM SO4	mean NO3- @10mMSO4	SD NO3- @10mM SO4	model NO3- @2mMSO4	model NO3- @10mMSO4
mM	mmol cm-2 h-1	mmol cm-2 h-1		mM	mmol cm-2 h-1	mmol cm-2 h-1	mmol cm-2 h-1	mmol cm-2 h-1		mM	mmol cm-2 h-1	mmol cm-2 h-1	mmol cm-2 h-1	mmol cm-2 h-1	mmol cm-2 h-1	mmol cm-2 h-1
0	10.783	10.72		0	25.959	34.205	7.532	8.873		0	-0.0481898	0.0681506	0	0	-2.2903	-0.0573
2	15.717	19.999		0.1	19.3	24.771	12.296	15.442		0.1	0.493718	0.503867	-1.38864	7.31047	-0.63528	-2.7247
3	8.553	13.966		0.25	2.586	0.307	94.409	172.638		0.25	-0.155483	6.63075	-25.0148	15.3144	-1.5882	-6.81175
6	19.2	19.001		0.5	-3.99	21.651	80.456	139.232		0.5	4.47778	14.9917	-9.14174	19.1212	-3.1764	-13.6235
9	29.596	19.547		1	10.729	8.735	171.898	114.392		1	-7.92384	28.1784	-4.04913	18.8752	-6.3528	-27.247
15	78.704	97.095		2	77.284	77.09	265.359	200.301		2	-51.6101	91.3105	-66.1843	59.3241	-12.7056	-54.494
				4	68.9935		283.824	326.866		4	-11.1353	0	-108.509	87.1063	-25.4112	-108.988
										5					-31.764	-136.235
